# Supplementary material for: Individualization of Hematopoietic Stem Cell Transplantation Using Alpha/Beta T-Cell Depletion
Source: Front Immunol. 2019 Feb 11;10:189. doi: 10.3389/fimmu.2019.00189 (PMC6378311; doi:10.3389/fimmu.2019.00189)
Supplement: Supplementary file 1 [file Table_1.pdf]

**Supplemental Table 1.** Clinical definitions used in the study.

| Category                                                                                                                                                                                     | Criteria/definition                                                                                                                                                            |
|----------------------------------------------------------------------------------------------------------------------------------------------------------------------------------------------|--------------------------------------------------------------------------------------------------------------------------------------------------------------------------------|
| <b>Infusion indications</b> (definitions of graft function according to stated EBMT criteria)                                                                                                |                                                                                                                                                                                |
| <i>Primary graft failure (GF)</i>                                                                                                                                                            | ANC <0.5x10 <sup>9</sup> /L by day +28<br>Hemoglobine <80 g/L and platelets <20x10 <sup>9</sup> /L<br>RIC: Confirmation of donor cell origin is required<br>CBT: Up to day +42 |
| <i>Secondary graft failure</i>                                                                                                                                                               | ANC <0.5x10 <sup>9</sup> /L after initial engraftment not related to relapse, infection or drug toxicity                                                                       |
| <i>Poor graft function (PGF)</i>                                                                                                                                                             | Two or three cytopenias >2 weeks, after day +28 in the presence of donor chimerism >5%                                                                                         |
| <i>Graft rejection (GR)</i>                                                                                                                                                                  | GF caused by immune rejection of donor cells mediated by host cells                                                                                                            |
| <b>Transfusion dependency and G-CSF treatment</b> (decided by authors)                                                                                                                       |                                                                                                                                                                                |
| <i>Pre-infusion</i>                                                                                                                                                                          | Transfusions/doses given during the last month prior to αβ T-cell depleted infusion                                                                                            |
| <i>Post-infusion</i>                                                                                                                                                                         | Transfusions/doses given day +30 to day +180 after αβ T-cell depleted infusion                                                                                                 |
| <b>Overall clinical grading of severity of acute GVHD</b> (according to previous literature)                                                                                                 |                                                                                                                                                                                |
| Glucksberg, H., <i>et al.</i> , Clinical manifestations of graft-versus-host disease in human recipients of marrow from HLA-matched sibling donors. Transplantation, 1974. 18(4): p. 295-304 |                                                                                                                                                                                |
| <i>Abbreviations:</i> ANC, absolute neutrophil count; RIC: reduced intense conditioning; CBT, cord blood transplantation.                                                                    |                                                                                                                                                                                |
