# Supplementary material for: Individualization of Hematopoietic Stem Cell Transplantation Using Alpha/Beta T-Cell Depletion
Source: PubMed Central journal article supplement (PMC6378311; doi:10.3389/fimmu.2019.00189), 2019-02-11
Supplement: Table_2.pdf [file Table_2.pdf]

**Supplemental Table 2.** Major infectious problems among patients at the time of infusion of  $\alpha\beta$  T-cell depleted cell product and 3 months post infusion.

| Major infectious problems |                                                                      |                                                           |
|---------------------------|----------------------------------------------------------------------|-----------------------------------------------------------|
| Patient ID                | At time of $\alpha\beta$ T-cell depleted infusion                    | + 3 months post-infusion                                  |
| 1                         | Severe mucositis                                                     | None                                                      |
| 2                         | Cerebral toxoplasmosis, CMV                                          | Cerebral toxoplasmosis                                    |
| 3                         | Resistant HSV1-ulcer                                                 | Resistant HSV1-ulcer                                      |
| 4                         | CMV-enterocolitis, <i>Zygomycete</i> *                               | CMV-enterocolitis, <i>Zygomycete</i> *                    |
| 5                         | None                                                                 | None                                                      |
| 6                         | CMV                                                                  | None                                                      |
| 7                         | CMV                                                                  | None                                                      |
| 8                         | <i>Aspergillus</i> *                                                 | None                                                      |
| 9                         | None                                                                 | None                                                      |
| 10                        | Recurrent <i>Clostridium difficile</i> (feces), HHV-6                | Recurrent <i>Clostridium difficile</i> (feces), Influenza |
| 11                        | Adenovirus (feces + blood), local <i>Staphylococcus aureus</i> (CVK) | None                                                      |
| 12                        | CMV-colitis                                                          | CMV, <i>Pseudomonas</i> (septicemia x 2)                  |

\*lung lesions under treatment. Abbreviations: CMV, cytomegalovirus; HSV-1, herpes simplex virus 1; HHV-6, human herpesvirus 6; CVK, central venous catheter
