# Supplementary material for: Individualization of Hematopoietic Stem Cell Transplantation Using Alpha/Beta T-Cell Depletion
Source: PubMed Central journal article supplement (PMC6378311; doi:10.3389/fimmu.2019.00189), 2019-02-11
Supplement: Table_3.pdf [file Table_3.pdf]

**Supplemental Table 3.** Normal reference values for platelets, granulocytes, lymphocytes and lymphocyte subsets in peripheral blood of healthy individuals.

| Age (years) | Platelets (10 <sup>9</sup> /L) | Granulocytes (10 <sup>9</sup> /L) | Lymphocytes (10 <sup>9</sup> /L) | CD3+ (cells/ μL) | CD3+CD4+ (cells/ μL) | CD3+CD8+ (cells/ μL) | CD19+ (cells/ μL) | CD16/56+ (cells/ μL) |
|-------------|--------------------------------|-----------------------------------|----------------------------------|------------------|----------------------|----------------------|-------------------|----------------------|
| 1-2         | 150-400                        | 1.5-8.8                           | 3.0-11.2                         | N/A              | N/A                  | N/A                  | N/A               | N/A                  |
| 3-4         |                                | 2.0-9.6                           | 2.1-9.6                          | N/A              | N/A                  | N/A                  | N/A               | N/A                  |
| ≥18         | F: 165-387<br>M: 145-348       | 1.6-5.9                           | 1.1-3.5                          | 780-2070         | 490-1340             | 190-800              | 90-400            | 70-420               |

Reference values according to Karolinska University Laboratory, Stockholm, Sweden.
